# Supplementary material for: Fibroblast-derived Hgf controls recruitment and expansion of muscle during morphogenesis of the mammalian diaphragm
Source: eLife. 2022 Sep 26;11:e74592. doi: 10.7554/eLife.74592 (PMC9514848; doi:10.7554/eLife.74592)
Supplement: Figure 1—figure supplement 1—source data 1. [file elife-74592-fig1-figsupp1-data1.xlsx]

## Sheet: Sheet1
Figure 1 - Figure Supplement 1 Source Data
ΔCT (18S RNA CT subtracted from CT of gene of interest, of Pax7, Met, and HGF) from E12.5 PPFs
Pax7	Met	HGF
18.3806	18.1601	18.3707
20.5343	18.7876	18.5771
18.4388	18.3783	18.7219
19.6595	19.5055	19.891
18.7952	18.5642	18.6364
