# Supplementary material for: Fibroblast-derived Hgf controls recruitment and expansion of muscle during morphogenesis of the mammalian diaphragm
Source: eLife. 2022 Sep 26;11:e74592. doi: 10.7554/eLife.74592 (PMC9514848; doi:10.7554/eLife.74592)
Supplement: Figure 1—source data 1. [file elife-74592-fig1-data1.xlsx]

## Sheet: Sheet1
Figure 1 - Source Data 1
Figure 1G-H: Phenotypes after deletion of HGF in Pax3 lineage
Sample Number	Stage	Tam	Genotype	Limb Phenotype	Diaphragm Phenotype
34139L2	E14.5	NA	Pax3+/+HGFdel/flRosaLacZ/+	Muscled	Muscled
34139L3	E14.5	NA	Pax3KI/+HGFfl/+RosaLacZ/+	Muscled	Muscled
34398L1	E14.5	NA	Pax3KI/+HGFfl/+RosaLacZ/+	Muscled	Muscled
34398L2	E14.5	NA	Pax3KI/+HGFfl/+RosaLacZ/+	Muscled	Muscled
34398L3	E14.5	NA	Pax3KI/+HGFfl/delRosaLacZ/+	Muscled	Muscled
34398R2	E14.5	NA	Pax3KI/+HGFfl/delRosaLacZ/+	Muscled	Muscled
34398R3	E14.5	NA	Pax3KI/+HGFfl/delRosaLacZ/+	Muscled	Muscled
Figure 1I-J: Phenotypes after deletion of Met in Pax3 lineage
38927L1	E14.5	NA	Pax3KI/+Metfl/+RosamTmG/+	Muscled	Muscled
38927L2	E14.5	NA	Pax3KI/+Metfl/delRosamTmG/+	No muscle	No muscle
38927L3	E14.5	NA	Pax3KI/+Metfl/delRosamTmG/+	No muscle	No muscle
38927L4	E14.5	NA	Pax3KI/+Metfl/delRosamTmG/+	No muscle	No muscle
38927R3	E14.5	NA	Pax3+/+Metfl/+RosamTmG/+	Muscled	Muscled
Figure 1K-L: Phenotypes after deletion of Met in PDGFRa lineage
39293L1	E14.5	6mg@E9.5	PDGFRaCreERT2/+Metfl/delRosamTmG/+	Muscled	Muscled
39293L2	E14.5	6mg@E9.5	PDGFRaCreERT2/+Metfl/+RosamTmG/+	Muscled	Muscled
39293L3	E14.5	6mg@E9.5	PDGFRaCreERT2/+Metfl/delRosamTmG/+	Muscled	Muscled
39293L4	E14.5	6mg@E9.5	PDGFRaCreERT2/+Metfl/delRosamTmG/+	Muscled	Muscled
39293R2	E14.5	6mg@E9.5	PDGFRa+/+Metfl/delRosamTmG/+	Muscled	Muscled
Figure 1M-N: Phenotypes after deletion of HGF in PDGFRa lineage
52863L1	E14.5	3mg@E8.5	PDGFRaCreERT2/+HGFfl/del	Partial muscle	No muscle
52863R1	E14.5	3mg@E8.5	PDGFRa+/+HGFfl/del	Muscled	Muscled
52864L1	E14.5	3mg@E8.5	PDGFRaCreERT2/+HGFfl/del	No muscle	No muscle
52864L2	E14.5	3mg@E8.5	PDGFRaCreERT2/+HGFfl/+	Muscled	Muscled
52864R1	E14.5	3mg@E8.5	PDGFRa+/+HGFfl/+	Muscled	Muscled
52864R3	E14.5	3mg@E8.5	PDGFRa+/+HGFfl/del	Muscled	Muscled
53147R3	E14.5	3mg@E8.5	PDGFRaCreERT2/+HGFfl/del	Partial muscle	No muscle
53147R4	E14.5	3mg@E8.5	PDGFRa+/+HGFfl/+	Muscled	Muscled
53147R5	E14.5	3mg@E8.5	PDGFRaCreERT2/+HGFfl/del	Partial muscle	No muscle
