# Supplementary material for: Fibroblast-derived Hgf controls recruitment and expansion of muscle during morphogenesis of the mammalian diaphragm
Source: eLife. 2022 Sep 26;11:e74592. doi: 10.7554/eLife.74592 (PMC9514848; doi:10.7554/eLife.74592)
Supplement: Figure 2—source data 1. [file elife-74592-fig2-data1.xlsx]

## Sheet: Sheet1
Figure 2 - Source Data 1
Stages: E16.5-E18.5 (when diaphragm is fully muscularized)
Sample Number	Tam	Genotype	Limb Phenotype	Diaphragm Phenotype
34818.R3	6mg@E9.5	PDGFRaCreERT2/+HGFdel/fl	No muscle	No muscle
36827.L2	3mg@E9.5	PDGFRaCreERT2/+HGFdel/fl	No muscle	No muscle
35980.R1	3mg@E9.5	PDGFRaCreERT2/+HGFdel/fl	Left acromiodeltoid absent and spino deltoid is much reduced; Right side, very few fibers in acromiodeltoid or spinodeltoid	Almost no muscle (small patch of muscle in ventral right, but looks like its coming from the body wall)
35980.R4	3mg@E9.5	PDGFRaCreERT2/+HGFdel/fl	Left spinodeltoid strongly reduced, acromiodeltoid missing; Right side, spino deltoid and acromio deltoid smaller and mispatterned with 2 muscle heads criscrossing each other	No muscle
36827.R4	3mg@E9.5	PDGFRaCreERT2/+HGFdel/fl	Acromiodeltoid and spino deltoid reduced on left and right side (more pronounced reduction on left side)	Little muscle (muscleless patches in dorsal left and right, large muscleless region in ventral right)
36827.L1	3mg@E9.5	PDGFRaCreERT2/+HGFdel/fl	Right side acromiodeltoid lateral head absent	Little muscle (large muscleless patches)
36910.L1	3mg@E9.5	PDGFRaCreERT2/+HGFdel/fl	Normal muscle	No muscle
36910.L2	3mg@E9.5	PDGFRaCreERT2/+HGFdel/fl	Normal muscle	No muscle
36826.R2	3mg@E9.5	PDGFRaCreERT2/+HGFdel/fl	Normal muscle	Ventral muscleless region
36826.R1	3mg@E9.5	PDGFRaCreERT2/+HGFdel/fl	Normal muscle	Small ventral muscleless region
35980.L1	3mg@E9.5	PDGFRaCreERT2/+HGFdel/fl	Normal muscle	Ventral muscleless regions in right diaphragm
34816.L3	6mg@E9.5	PDGFRaCreERT2/+HGFdel/fl	Normal muscle	Ventral muscleless region
35980.R3	3mg@E9.5	PDGFRaCreERT2/+HGFfl/+	Normal muscle	Normal muscle
36826.L3	3mg@E9.5	PDGFRaCreERT2/+HGFfl/+	Normal muscle	Normal muscle
36827.L3	3mg@E9.5	PDGFRaCreERT2/+HGFfl/+	Normal muscle	Normal muscle
36910.R2	3mg@E9.5	PDGFRaCreERT2/+HGFfl/+	Normal muscle	Normal muscle
36826.L1	3mg@E9.5	PDGFRa+/+HGFfl/+	Normal muscle	Normal muscle
36826.L2	3mg@E9.5	PDGFRa+/+HGFfl/+	Normal muscle	Normal muscle
35980.R5	3mg@E9.5	PDGFRa+/+HGFdel/fl	Normal muscle	Normal muscle
35980.R2	3mg@E9.5	PDGFRa+/+HGFfl/+	Normal muscle	Normal muscle
35980.L3	3mg@E9.5	PDGFRa+/+HGFfl/+	Normal muscle	Full muscle, but fibers somewhat fused (possible staining artifact)
36910.L4	3mg@E9.5	PDGFRa+/+HGFfl/+	Normal muscle	Normal muscle
