# Supplementary material for: Fibroblast-derived Hgf controls recruitment and expansion of muscle during morphogenesis of the mammalian diaphragm
Source: eLife. 2022 Sep 26;11:e74592. doi: 10.7554/eLife.74592 (PMC9514848; doi:10.7554/eLife.74592)
Supplement: Figure 3—figure supplement 1—source data 1. [file elife-74592-fig3-figsupp1-data1.xlsx]

## Sheet: Sheet1
Figure 3 - Figure Supplement 1 - Source Data 1
Figure 1D: Crown rump length measurements
Crown rump length measurements (um)
Met+/+	MetΔ/+	MetΔ/Δ
5728.57	5709.54	5738.09
6061.9	5314.29	5366.67
5538.1	5495.24	6057.14
	4838.1	5261.9
Figure 1E: Limb length measurements
Limb length measurements (um)
Met+/+	MetΔ/+	MetΔ/Δ
961.9	995.24	919.05
1086.85	923	1004.76
1161.9	1042.86	1109.52
	923.81
Figure 1F: Number of Axon branchpoints in phrenic nerve
Number of axon branches/fasicles at E12.5 (from wholemount confocal)
Met+/+	MetΔ/+	MetΔ/Δ
69	48	13
47	60	9
47	56	19
