# Supplementary material for: Fibroblast-derived Hgf controls recruitment and expansion of muscle during morphogenesis of the mammalian diaphragm
Source: eLife. 2022 Sep 26;11:e74592. doi: 10.7554/eLife.74592 (PMC9514848; doi:10.7554/eLife.74592)
Supplement: Figure 3—figure supplement 2—source data 1. [file elife-74592-fig3-figsupp2-data1.xlsx]

## Sheet: Sheet1
Figure 3 - Figure Supplement 2 - Source Data 1
Number of axon branches/fasicles at E11.5 (from wholemount confocal)
Figure 3 - Figure Supplement 2A-C: Number of branchpoints in the phrenic nerve
Olig2Cre/+; Metfl/+	Olig2Cre/+; Met∆/fl
55	33
26	29
36	45
	58
Figure 3 - Figure Supplement 2D-F: Number of branchpoints in the phrenic nerve
Pax3+/+	Pax3SpD/SpD
39	17
39	15
38	10
