# Supplementary material for: Fibroblast-derived Hgf controls recruitment and expansion of muscle during morphogenesis of the mammalian diaphragm
Source: eLife. 2022 Sep 26;11:e74592. doi: 10.7554/eLife.74592 (PMC9514848; doi:10.7554/eLife.74592)
Supplement: Figure 3—source data 1. [file elife-74592-fig3-data1.xlsx]

## Sheet: Sheet1
Figure 3 - Source Data 1
Figure 3A-B: Phrenic nerve phenotypes following loss of HGF
Sample Number	Stage	Genotype	Diaphragm Phenotype
40135.L2	E12.0	HGFdel/del	Right phrenic nerve 2 branches (Y-shaped), left phrenic split in 3 branches
40135.R1	E12.0	HGFdel/del	Right phrenic nerve 2 branches (Y-shaped), left phrenic split in 3 branches
40135.R4	E12.0	HGFdel/del	Right phrenic nerve 2 branches (Y-shaped), left phrenic one branch
40135.L4	E12.0	HGF+/+	Right and left phrenic both have numerous small branches
33359.R2	E12.5	HGFdel/+	Right and left phrenic nerve into numerous small branches
32904.L1	E12.5	HGFdel/+	Left and right prenic nerve into numerous small branches, including elongate costal branch
Figure 3C-D: Diaphragm phenotypes following loss of HGF in Prx1 lineage
Sample Number	Stage	Genotype	Diaphragm Phenotype
28029.3	E18.5	Prx1CreTg/+HGFfl/fl	Partial muscle (large muscleless region dorsal right & left, ventral left)
28029.4	E18.5	Prx1CreTg/+HGFfl/fl	No muscle
28029.9	E18.5	Prx1CreTg/+HGFfl/fl	No muscle
28030.7	E18.5	Prx1CreTg/+HGFfl/fl	Partial muscle (large muscleless regions dorsal right & left, ventral left)
28216.1	E18.5	Prx1CreTg/+HGFfl/fl	Partial muscle, strip of muscle on right side otherwise muscleless
28216.2	E18.5	Prx1CreTg/+HGFfl/fl	No muscle
28216.1	E18.5	Prx1CreTg/+HGFfl/fl	Partial muscle (Muscleless regions dorsally)
28220.1	E18.5	Prx1CreTg/+HGFfl/fl	Partial muscle (muscleless region in dorsal right and ventral)
28220.8	E18.5	Prx1CreTg/+HGFfl/fl	Partial muscle (muscleless in dorsal left and right, ventral right)
29001.4	E18.5	Prx1CreTg/+HGFfl/fl	Partial muscle (large muscleless region in dorsal right, dorsal left, ventral)
29001.7	E18.5	Prx1CreTg/+HGFfl/fl	No muscle
29295.3	E18.5	Prx1CreTg/+HGFfl/fl	No muscle
28029.8	E18.5	Prx1Cre+/+HGFfl/fl	Normal muscle
28216.3	E18.5	Prx1CreTg/+HGFfl/+	Normal muscle
28216.8	E18.5	Prx1CreTg/+HGFfl/+	Partial muscle loss ventrally
28220.2	E18.5	Prx1CreTg/+HGFfl/+	Normal muscle
28220.3	E18.5	Prx1CreTg/+HGFfl/+	Normal muscle
28220.4	E18.5	Prx1CreTg/+HGFfl/+	Normal muscle
28220.7	E18.5	Prx1CreTg/+HGFfl/+	Normal muscle
Figure 3K: Phrenic nerve branchpoints following loss of Met
Number of axon branches/fasicles at E11.5 (from wholemount confocal)
Met+/+	MetΔ/+	MetΔ/Δ
44	27	10
37	33	16
36	19	11
	17	10
