# Supplementary material for: Fibroblast-derived Hgf controls recruitment and expansion of muscle during morphogenesis of the mammalian diaphragm
Source: eLife. 2022 Sep 26;11:e74592. doi: 10.7554/eLife.74592 (PMC9514848; doi:10.7554/eLife.74592)
Supplement: Figure 4—figure supplement 1—source data 1. [file elife-74592-fig4-figsupp1-data1.xlsx]

## Sheet: Sheet1
Figure 4 - figure supplement 1 - source data 1
Figure 4 - figure supplement 1A-C: sample information
Sample Number	Stage	Tam	Genotype	Diaphragm Phenotype
37698.L2	E13.5	NA	Prx1CreTg/+HGF+/+RosaLacZ/+	PPFs spread normally
45022.R4	E13.5	NA	Prx1CreTg/+HGF+/+RosaLacZ/+	PPFs spread normally
45535.L1	E13.5	NA	Prx1CreTg/+HGF+/+RosaLacZ/+	PPFs spread normally
45535.R1	E13.5	NA	Prx1CreTg/+HGF+/+RosaLacZ/+	PPFs spread normally
45535.R2	E13.5	NA	Prx1CreTg/+HGF+/+RosaLacZ/+	PPFs spread normally
44520.L2	E13.5	NA	Prx1CreTg/+HGF+/+RosaLacZ/+	PPFs spread normally
37698.L1	E13.5	NA	Prx1CreTg/+HGFdel/+RosaLacZ/+	PPFs spread normally
37698.L3	E13.5	NA	Prx1CreTg/+HGFdel/+RosaLacZ/+	PPFs spread normally
41381.R2	E13.5	NA	Prx1CreTg/+HGFdel/+RosaLacZ/+	PPFs spread normally
41381.R4	E13.5	NA	Prx1CreTg/+HGFdel/+RosaLacZ/+	PPFs spread normally
41810.L1	E13.5	NA	Prx1CreTg/+HGFdel/+RosaLacZ/+	PPFs spread normally
41810.R2	E13.5	NA	Prx1CreTg/+HGFdel/+RosaLacZ/+	PPFs spread normally
41810.R5	E13.5	NA	Prx1CreTg/+HGFdel/+RosaLacZ/+	PPFs spread normally
42198.L1	E13.5	NA	Prx1CreTg/+HGFdel/+RosaLacZ/+	PPFs spread normally
45535.R4	E13.5	NA	Prx1CreTg/+HGFdel/+RosaLacZ/+	PPFs spread normally
42198.L2	E13.5	NA	Prx1CreTg/+HGFdel/+RosaLacZ/+	PPFs spread normally
45022.R2	E13.5	NA	Prx1CreTg/+HGFdel/delRosaLacZ/+	PPFs spread normally
40913.R2	E13.5	NA	Prx1CreTg/+HGFdel/delRosaLacZ/+	PPFs spread normally
44520.R1	E13.5	NA	Prx1CreTg/+HGFdel/delRosaLacZ/+	PPFs spread normally
Figure 4 - figure supplement 1D-F: sample information
Sample Number	Stage	Tam	Genotype	Diaphragm Phenotype
51645.L4	E15.5	3mg@E9.5	PDGFRaCreERT2/+HGFfl/delRosamTmG/+	Fibroblasts in muscleless region
51645.R2	E15.5	3mg@E9.5	PDGFRaCreERT2/+HGFfl/delRosamTmG/+	Fibroblasts in muscleless region
52678R2	E15.5	3mg@E9.5	PDGFRaCreERT2/+HGFfl/delRosamTmG/+	Fibroblasts in muscleless region
52678R3	E15.5	3mg@E9.5	PDGFRaCreERT2/+HGFfl/delRosamTmG/+	Fibroblasts in muscleless region
