# Supplementary material for: Fibroblast-derived Hgf controls recruitment and expansion of muscle during morphogenesis of the mammalian diaphragm
Source: eLife. 2022 Sep 26;11:e74592. doi: 10.7554/eLife.74592 (PMC9514848; doi:10.7554/eLife.74592)
Supplement: Figure 4—source data 1. [file elife-74592-fig4-data1.xlsx]

## Sheet: Sheet1
Figure 4 - Source Data 1
Figure 4B: Phenotypes at E14.5 after deletion of HGF in PDGFRa lineage with tamoxifen at E9.0
Sample Number	Stage	Tam	Genotype	Diaphragm Phenotype
33376.L1	E14.5	6mg@E9.0	PDGFRaCreERT2/+HGFfl/del	No muscle
33376.L2	E14.5	6mg@E9.0	PDGFRaCreERT2/+HGFfl/del	No muscle
33520.R1	E14.5	6mg@E9.0	PDGFRaCreERT2/+HGFfl/del	No muscle
33376.L4	E14.5	6mg@E9.0	PDGFRa+/+HGFfl/+	Normal muscle
33376.R1	E14.5	6mg@E9.0	PDGFRa+/+HGFfl/+	Normal muscle
33520.R2	E14.5	6mg@E9.0	PDGFRaCreERT2/+HGFfl/+	Normal muscle
Figure 4C: Phenotypes at E14.5 after deletion of HGF in PDGFRa lineage with tamoxifen at E9.5
Sample Number	Stage	Tam	Genotype	Diaphragm Phenotype
32803.L1	E14.5	6mg@E9.5	PDGFRaCreERT2/+HGFfl/del	Partial muscle (muscleless patch in right dorsal; large swath of right ventral; streaks of muscleless areas on left side)
32803.L3	E14.5	6mg@E9.5	PDGFRaCreERT2/+HGFfl/del	Partial muscle (Muscleless patch in right dorsal; large part of right ventral muscleless; streaks of muscleless regions on left side)
32803.R1	E14.5	6mg@E9.5	PDGFRaCreERT2/+HGFfl/del	Partial muscle (large ventral right muscleless region)
32961.L2	E14.5	6mg@E9.5	PDGFRaCreERT2/+HGFfl/del	Partial muscle (Muscleless patch in right ventral; streaks of muscle on left side; aberrant split of sternocostal on right side)
33460.L3	E14.5	6mg@E9.5	PDGFRaCreERT2/+HGFfl/del	Partial muscle (just a few streaks of muscle on left side)
33460.R1	E14.5	6mg@E9.5	PDGFRaCreERT2/+HGFfl/del	Partial muscle (muscle reduced on left side, poor staining on right)
32803.L2	E14.5	6mg@E9.5	PDGFRaCreERT2/+HGFfl/+	Normal muscle
32803.R2	E14.5	6mg@E9.5	PDGFRaCreERT2/+HGFfl/+	Normal muscle
32803.R3	E14.5	6mg@E9.5	PDGFRaCreERT2/+HGFfl/+	Normal muscle
32961.L1	E14.5	6mg@E9.5	PDGFRa+/+HGFfl/del	Normal muscle
32961.L3	E14.5	6mg@E9.5	PDGFRaCreERT2/+HGFfl/+	Normal muscle
33460.L1	E14.5	6mg@E9.5	PDGFRaCreERT2/+HGFfl/+	Normal muscle
33460.L2	E14.5	6mg@E9.5	PDGFRa+/+HGFfl/del	Normal muscle
Figure 4: Phenotypes at E14.5 after deletion of HGF in PDGFRa lineage with tamoxifen at E10.0
Sample Number	Stage	Tam	Genotype	Diaphragm Phenotype
33518.L1	E14.5	6mg@E10.0	PDGFRaCreERT2/+HGFfl/del	Partial muscle (Ventral muscleless region on left and right; muscleless patch on dorsal left)
33518.L2	E14.5	6mg@E10.0	PDGFRaCreERT2/+HGFfl/del	Partial muscle (ventral mucleless region on left and right)
33518.R1	E14.5	6mg@E10.0	PDGFRaCreERT2/+HGFfl/del	Partial muscle (Ventral muscleless patch)
33518.R3	E14.5	6mg@E10.0	PDGFRaCreERT2/+HGFfl/del	Partial muscle (ventral muscleless region; dorsal normal)
33521.L3	E14.5	6mg@E10.0	PDGFRaCreERT2/+HGFfl/del	Partial muscle (muscleless streak near vena cava, but phenotype not severe; dorsal muscleless streak as well on right side)
33521.L4	E14.5	6mg@E10.0	PDGFRaCreERT2/+HGFfl/del	Partial muscle (Right ventral region almost entirely muscleless; muscle on left looks much better, but streaky)
33521.L7	E14.5	6mg@E10.0	PDGFRaCreERT2/+HGFfl/del	No muscle (diaphragm much smaller & younger, looks ~E13.5)
33518.L3	E14.5	6mg@E10.0	PDGFRaCreERT2/+HGFfl/+	Normal muscle
33518.L4	E14.5	6mg@E10.0	PDGFRa+/+HGFfl/+	Normal muscle
33518.R2	E14.5	6mg@E10.0	PDGFRa+/+HGFfl/+	Normal muscle
33518.R4	E14.5	6mg@E10.0	PDGFRa+/+HGFfl/+	Normal muscle
33521.L8	E14.5	6mg@E10.0	PDGFRa+/+HGFfl/del	Normal muscle
33521.R1	E14.5	6mg@E10.0	PDGFRa+/+HGFfl/del	Normal muscle
Figure 4D: Phenotypes at E14.5 after deletion of HGF in PDGFRa lineage with tamoxifen at E10.5
Sample Number	Stage	Tam	Genotype	Diaphragm Phenotype
31768.R2	E14.5	6mg@E10.5	PDGFRaCreERT2/+HGFfl/del	Partial muscle
31768.R4	E14.5	6mg@E10.5	PDGFRaCreERT2/+HGFfl/del	Partial muscle
32360.R2	E14.5	6mg@E10.5	PDGFRaCreERT2/+HGFfl/del	Normal muscle
32360.R4	E14.5	6mg@E10.5	PDGFRaCreERT2/+HGFfl/del	Normal muscle
32100.R2	E14.5	6mg@E10.5	PDGFRaCreERT2/+HGFfl/del	Normal muscle
32100.R3	E14.5	6mg@E10.5	PDGFRaCreERT2/+HGFfl/del	Normal muscle
32100.R5	E14.5	6mg@E10.5	PDGFRaCreERT2/+HGFfl/del	Normal muscle
32361.R1	E14.5	6mg@E10.5	PDGFRaCreERT2/+HGFfl/del	Normal muscle
32312.L4	E14.5	6mg@E10.5	PDGFRaCreERT2/+HGFfl/del	Normal muscle
32312.R3	E14.5	6mg@E10.5	PDGFRaCreERT2/+HGFfl/del	Normal muscle
32313.L1	E14.5	6mg@E10.5	PDGFRaCreERT2/+HGFfl/del	Normal muscle
32314.L1	E14.5	6mg@E10.5	PDGFRaCreERT2/+HGFfl/del	Normal muscle
32314.R5	E14.5	6mg@E10.5	PDGFRaCreERT2/+HGFfl/del	Normal muscle
31768.L1	E14.5	6mg@E10.5	PDGFRa+/+HGFfl/del	Normal muscle
31768.R1	E14.5	6mg@E10.5	PDGFRa+/+HGFfl/+	Normal muscle
31768.R3	E14.5	6mg@E10.5	PDGFRa+/+HGFfl/del	Normal muscle
32360.R4	E14.5	6mg@E10.5	PDGFRaCreERT2/+HGFfl/+	Normal muscle
32360.R5	E14.5	6mg@E10.5	PDGFRa+/+HGFfl/del	Normal muscle
32100.L1	E14.5	6mg@E10.5	PDGFRa+/+HGFfl/del	Normal muscle
32100.L3	E14.5	6mg@E10.5	PDGFRa+/+HGFfl/del	Normal muscle
32100.L4	E14.5	6mg@E10.5	PDGFRa+/+HGFfl/+	Normal muscle
32312.L2	E14.5	6mg@E10.5	PDGFRa+/+HGFfl/+	Normal muscle
32312.L3	E14.5	6mg@E10.5	PDGFRaCreERT2/+HGFfl/+	Normal muscle
32312.L5	E14.5	6mg@E10.5	PDGFRaCreERT2/+HGFfl/+	Normal muscle
Figure 4F: Phenotypes at E17.5 after deletion of HGF in PDGFRa lineage with tamoxifen at E10.5
Sample Number	Stage	Tam	Genotype	Diaphragm Phenotype
42579.2	E18.5	6mg@E10.5	PDGFRaCreERT2/+HGFfl/del	Partial muscle (muscleless regions in dorsal left, dorsal right and ventral right)
47623.L1	E17.5	6mg@E10.5	PDGFRaCreERT2/+HGFfl/del	Partial muscle (ventral muscleless region on right side)
47883.L1	E17.5	6mg@E10.5	PDGFRaCreERT2/+HGFfl/del	Partial muscle (ventral muscleless region on right side)
47883.R1	E17.5	6mg@E10.5	PDGFRaCreERT2/+HGFfl/del	Normal Muscle
Figure 4E,G: Phenotypes at E17.5 after deletion of HGF in PDGFRa lineage with tamoxifen at E11.5
Sample Number	Stage	Tam	Genotype	Diaphragm Phenotype
47978.L1	E17.5	6mg@E11.5	PDGFRaCreERT2/+HGFfl/del	Partial muscle (small muscleless region ventral right)
47978.L3	E17.5	6mg@E11.5	PDGFRaCreERT2/+HGFfl/del	Partial muscle (small muscleless region ventral right)
47978.R3	E17.5	6mg@E11.5	PDGFRaCreERT2/+HGFfl/del	Partial muscle (small ventral muscleless region)
49250.L1	E17.5	6mg@E11.5	PDGFRaCreERT2/+HGFfl/del	Partial muscle (small ventral muscleless region)
47978.L2	E17.5	6mg@E11.5	PDGFRa+/+HGFfl/+	Normal muscle
47978.R1	E17.5	6mg@E11.5	PDGFRa+/+HGFfl/+	Normal muscle
47978.R2	E17.5	6mg@E11.5	PDGFRa+/+HGFfl/del	Normal muscle
