# Supplementary material for: Fibroblast-derived Hgf controls recruitment and expansion of muscle during morphogenesis of the mammalian diaphragm
Source: eLife. 2022 Sep 26;11:e74592. doi: 10.7554/eLife.74592 (PMC9514848; doi:10.7554/eLife.74592)
Supplement: Figure 5—figure supplement 1—source data 1. [file elife-74592-fig5-figsupp1-data1.xlsx]

## Sheet: Sheet1
Figure 5 - figure supplement 1 - source data 1
Figure 5 - figure supplement 1A-B
Sample Number	Stage	Tam	Genotype	Diaphragm Phenotype
41969,3	P0	NA	Pax7iCre/+Metfl/+RosamTmG/+	Fully muscularized diaphragm
41969,6	P0	NA	Pax7iCre/+MetΔ/flRosamTmG/+	Fully muscularized diaphragm
41969,9	P0	NA	Pax7iCre/+MetΔ/flRosamTmG/+	Fully muscularized diaphragm
41969,10	P0	NA	Pax7iCre/+MetΔ/flRosamTmG/+	Fully muscularized diaphragm
41969,11	P0	NA	Pax7iCre/+MetΔ/flRosamTmG/+	Fully muscularized diaphragm
Figure 5 - figure supplement 1C-D
Sample Number	Stage	Tam	Genotype	Diaphragm Phenotype
37541.R2	E14.5	6mg@E9.5	Pax7CreER/+Metfl/+	Normal muscle
37541.R3	E14.5	6mg@E9.5	Pax7CreER/+Metfl/+	Normal muscle
37542.R4	E14.5	6mg@E10.5	Pax7+/+Metfl/+	Normal mucle
37541.R1	E14.5	6mg@E9.5	Pax7CreER/+MetΔ/fl	Normal muscle
37541.L1	E14.5	6mg@E9.5	Pax7CreER/+MetΔ/fl	Normal muscle
37541.L4	E14.5	6mg@E9.5	Pax7CreER/+MetΔ/fl	Normal muscle
37542.R3	E14.5	6mg@E10.5	Pax7CreER/+MetΔ/fl	Normal muscle
