# Supplementary material for: Fibroblast-derived Hgf controls recruitment and expansion of muscle during morphogenesis of the mammalian diaphragm
Source: eLife. 2022 Sep 26;11:e74592. doi: 10.7554/eLife.74592 (PMC9514848; doi:10.7554/eLife.74592)
Supplement: Figure 5—source data 1. [file elife-74592-fig5-data1.xlsx]

## Sheet: Sheet1
Figure 5 - Source Data 1
Figure 5A: Diaphragm muscle phenotype after vehicle treatment
Sample Number	Stage	Treatment	Genotype	Width of Ventral Gap in Muscle (um)	Diaphragm Phenotype
47238.L1	E17.5	Vehicle: 70% PEG-300 in PBS	WT +/+	42.436	Normal muscle
47238.L2	E17.5	Vehicle: 70% PEG-300 in PBS	WT +/+	15.216	Normal muscle
47238.L3	E17.5	Vehicle: 70% PEG-300 in PBS	WT +/+	25.521	Normal muscle
47238.L4	E17.5	Vehicle: 70% PEG-300 in PBS	WT +/+	27.257	Normal muscle
47238.L5	E17.5	Vehicle: 70% PEG-300 in PBS	WT +/+	26.699	Normal muscle
47238.R1	E17.5	Vehicle: 70% PEG-300 in PBS	WT +/+	52.245	Normal muscle
47238.R2	E17.5	Vehicle: 70% PEG-300 in PBS	WT +/+	40.303	Normal muscle
47238.R3	E17.5	Vehicle: 70% PEG-300 in PBS	WT +/+	72.044	Normal muscle (right side of diaphragm wider compared to left than usual)
47238.R4	E17.5	Vehicle: 70% PEG-300 in PBS	WT +/+	23.041	Normal muscle
47238.R5	E17.5	Vehicle: 70% PEG-300 in PBS	WT +/+	38.046	Normal muscle
47238.R6	E17.5	Vehicle: 70% PEG-300 in PBS	WT +/+	36.421	Normal muscle
47238.R7	E17.5	Vehicle: 70% PEG-300 in PBS	WT +/+	45.908	Normal muscle
Figure 5B: Diaphragm muscle phenotype after BMS777607 treatment E7.5 - E12.5
Sample Number	Stage	Treatment	Genotype	Width of Ventral Gap in Muscle (um)	Diaphragm Phenotype
47239.L1	E17.5	BMS777607 E7.5-E12.5	WT +/+	469.618	Partial muscle (muscleless dorsal left, dorsal right and ventral)
47239.L2	E17.5	BMS777607 E7.5-E12.5	WT +/+	738.72	Partial muscle (muscleless dorsal left, dorsal right and ventral)
47239.L3	E17.5	BMS777607 E7.5-E12.5	WT +/+	632.664	Partial muscle (muscleless dorsal left, dorsal right and ventral)
47239.R1	E17.5	BMS777607 E7.5-E12.5	WT +/+	800.647	Partial muscle (muscleless dorsal left, dorsal right and ventral)
47239.R2	E17.5	BMS777607 E7.5-E12.5	WT +/+	567.104	Partial muscle (muscleless dorsal left, dorsal right and ventral)
47239.R3	E17.5	BMS777607 E7.5-E12.5	WT +/+	628.497	Partial muscle (muscleless dorsal left, dorsal right and ventral)
47239.R4	E17.5	BMS777607 E7.5-E12.5	WT +/+	595.846	Partial muscle (muscleless dorsal left, dorsal right and ventral)
Figure 5C: Diaphragm muscle phenotype after BMS777607 treatment E8.5 - E9.5
Sample Number	Stage	Treatment	Genotype	Width of Ventral Gap in Muscle (um)	Diaphragm Phenotype
45509.L1	E17.5	BMS777607 E8.5-E9.5	Pax3+/+RosamTmG/+	409.189	Partial muscle (muscleless dorsal left, dorsal right and ventral)
45509.L2	E17.5	BMS777607 E8.5-E9.5	Pax3+/+RosamTmG/+	259.325	Partial muscle (ventral muscleless region)
44509.L3	E17.5	BMS777607 E8.5-E9.5	Pax3+/+RosamTmG/+	382.651	Partial muscle (ventral muscleless region)
45509.L4	E17.5	BMS777607 E8.5-E9.5	Pax3CreKI/+RosamTmG/+	786.049	Partial muscle (dorsal right and ventral muscleless regions)
45509.R1	E17.5	BMS777607 E8.5-E9.5	Pax3CreKI/+RosamTmG/+	809.97	Partial muscle (dorsal right and ventral muscleless regions)
45509.R1	E17.5	BMS777607 E8.5-E9.5	Pax3CreKI/+RosamTmG/+	921.776	Partial muscle (small ventral muscleless region)
Figure 5D: Diaphragm muscle phenotype after BMS777607 treatment E9.5 - E10.5
Sample Number	Stage	Treatment	Genotype	Width of Ventral Gap in Muscle (um)	Diaphragm Phenotype
44393.L1	E17.5	BMS777607 E9.5-E10.5	Pax3+/+RosamTmG/+	183.966	Partial muscle (small ventral muscleless region)
44393.L2	E17.5	BMS777607 E9.5-E10.5	Pax3+/+RosamTmG/+	534.028	Partial muscle (small ventral muscleless region)
44393.L3	E17.5	BMS777607 E9.5-E10.5	Pax3CreKI/+RosamTmG/+	529.328	Partial muscle (dorsal left, dorsal right, and small ventral muscleless region)
44393.L4	E17.5	BMS777607 E9.5-E10.5	Pax3+/+RosamTmG/+	442.498	Partial muscle (ventral muscleless region)
44393.R1	E17.5	BMS777607 E9.5-E10.5	Pax3CreKI/+RosamTmG/+	730.208	Partial muscle (dorsal left, dorsal right, and small ventral muscleless region)
44393.R2	E17.5	BMS777607 E9.5-E10.5	Pax3CreKI/+RosamTmG/+	105.977	Partial muscle (small ventral muscleless region)
44393.R3	E17.5	BMS777607 E9.5-E10.5	Pax3+/+RosamTmG/+	167.274	Small ventral midline muscleless region
44393.R4	E17.5	BMS777607 E9.5-E10.5	Pax3+/+RosamTmG/+	135.466	Small ventral midline muscleless region (patterning in ventral region aberrant as well)
Figure 5E: Diaphragm muscle phenotype after BMS777607 treatment E11.5 - E12.5
Sample Number	Stage	Treatment	Genotype	Width of Ventral Gap in Muscle (um)	Diaphragm Phenotype
46593.L1	E17.5	BMS777607 E11.5-E12.5	Pax3+/+RosamTmG/+	322.235	Small ventral midline muscleless region, small dorsal right muscleless region
46593.L2	E17.5	BMS777607 E11.5-E12.5	Pax3CreKI/+RosamTmG/+	603.013	Partial muscle (dorsal left, dorsal right and ventral midline muscleless regions)
46593.L3	E17.5	BMS777607 E11.5-E12.5	Pax3+/+RosamTmG/+	298.785	Dorsal right and ventral midline muscleless regions
46593.L4	E17.5	BMS777607 E11.5-E12.5	Pax3+/+RosamTmG/+	308.147	Dorsal right and ventral midline muscleless regions
46593.L5	E17.5	BMS777607 E11.5-E12.5	Pax3+/+RosamTmG/+	195.325	Small dorsal right and ventral midline muscleless regions
46593.L6	E17.5	BMS777607 E11.5-E12.5	Pax3CreKI/+RosamTmG/+	473.276	Small ventral midline muscleless region
46593.R1	E17.5	BMS777607 E11.5-E12.5	Pax3+/+RosamTmG/+	230.394	Small ventral midline muscleless region
46593.R2	E17.5	BMS777607 E11.5-E12.5	Pax3CreKI/+RosamTmG/+	687.822	Ventral midline muscleless region
46593.R3	E17.5	BMS777607 E11.5-E12.5	Pax3+/+RosamTmG/+	771.726	Dorsal right and ventral midline muscleless regions
