# Supplementary material for: Fibroblast-derived Hgf controls recruitment and expansion of muscle during morphogenesis of the mammalian diaphragm
Source: eLife. 2022 Sep 26;11:e74592. doi: 10.7554/eLife.74592 (PMC9514848; doi:10.7554/eLife.74592)
Supplement: Figure 6—figure supplement 1—source data 1. [file elife-74592-fig6-figsupp1-data1.xlsx]

## Sheet: Sheet1
Figure 6 - figure supplement 1 - source data 1
Fas mRNA Fold Change Relative Expression					Fas mRNA ddCT Relative Expression
DMSO	BMS777607				Vehicle	BMS777607
1.23726	2.76619				1.23726	2.76619
0.887948	2.14211				0.887948	2.14211
0.910234	2.49979				0.910234	2.49979
Trp53 mRNA Fold Change Relative Expression					Trp53 mRNA ddCT Relative Expression
DMSO	BMS777607				Vehicle	BMS777607
0.911174	1.16787				0.134201	-0.223885
0.870928	1.07562				0.199375	-0.105175
1.26013	0.931253				-0.333577	0.102754
Map1lc3a mRNA Fold Change Relative Expression					Map1lc3a mRNA ddCT Relative Expression
DMSO	BMS777607				Vehicle	BMS777607
0.917385	1.38202				0.124401	0.917385
0.991204	1.14266				0.0127455	0.991204
1.09973	1.18056				-0.137146	1.09973
