# Supplementary material for: Fibroblast-derived Hgf controls recruitment and expansion of muscle during morphogenesis of the mammalian diaphragm
Source: eLife. 2022 Sep 26;11:e74592. doi: 10.7554/eLife.74592 (PMC9514848; doi:10.7554/eLife.74592)
Supplement: Figure 7—source data 1. [file elife-74592-fig7-data1.xlsx]

## Sheet: Sheet1
Figure 7 - Source Data 1
Figure 7A-G: Sample Information for Immunofluorescence and EdU
Sample Number	Stage	Treatment	Genotype	Markers
49126.L2	E12.5	BMS777607 E7.5-E11.5	WT +/+	Pax7/MyoD/My32, Neuro, EdU
49126.R1	E12.5	BMS777607 E7.5-E11.5	WT +/+	Pax7/MyoD/My32, Neuro, EdU
49126.L3	E12.5	BMS777607 E7.5-E11.5	WT +/+	Pax7/MyoD/My32, Neuro, EdU
49126.L5	E12.5	BMS777607 E7.5-E11.5	WT +/+	Pax7/MyoD/My32, Neuro, EdU
45891.L1	E12.5	Vehicle: 70% PEG-300 in PBS	WT +/+	Pax7/MyoD/My32, Neuro, EdU
48591.R2	E12.5	Vehicle: 70% PEG-300 in PBS	WT +/+	Pax7/MyoD/My32, Neuro, EdU
48591.R3	E12.5	Vehicle: 70% PEG-300 in PBS	WT +/+	Pax7/MyoD/My32, Neuro, EdU
Figure 7H-M: Sample Information for Immunofluorescence and Cleaved Caspase 3
49126.L1	E12.5	BMS777607 E7.5-E11.5	WT +/+	Pax7/MyoD/My32, Neuro, Cleaved Caspase-3
49126.L4	E12.5	BMS777607 E7.5-E11.5	WT +/+	Pax7/MyoD/My32, Neuro, Cleaved Caspase-3
49126.R2	E12.5	BMS777607 E7.5-E11.5	WT +/+	Pax7/MyoD/My32, Neuro, Cleaved Caspase-3
48591.R4	E12.5	Vehicle: 70% PEG-300 in PBS	WT +/+	Pax7/MyoD/My32, Neuro, Cleaved Caspase-3
48591.R5	E12.5	Vehicle: 70% PEG-300 in PBS	WT +/+	Pax7/MyoD/My32, Neuro, Cleaved Caspase-3
48591.R6	E12.5	Vehicle: 70% PEG-300 in PBS	WT +/+	Pax7/MyoD/My32, Neuro, Cleaved Caspase-3
Figure 7G: Counts of EdU+ Cells
Total EdU+ Cells
Vehicle	BMS777607
8396	5467
8086	6940
9882	5527
	5366
Figure 7G: Counts of Cleaved Caspase-3+ Cells
Cleaved Caspase3+ Cells
Vehicle	BMS777607
51	145
46	83
30	96
Figure 7O-V: Counts of GFP+ and Pax7/MyoD/My32+ Cells
Sample	Genotype	Treatment	GFP+ Cells at leading ventral gap in muscle	Pax7/MyoD/My32+ cells at leading ventral gap in muscle
55601L1	Pax3CreKI/+; RosamTmG/+	Vehicle E11.5 - E12.5	159	41
55601L2	Pax3CreKI/+; RosamTmG/+	Vehicle E11.5 - E12.5	148	41
55601R1	Pax3CreKI/+; RosamTmG/+	Vehicle E11.5 - E12.5	107	33
56600L1	Pax3CreKI/+; RosamTmG/+	BMS777607 E11.5 - E12.5	120	18
56600R1	Pax3CreKI/+; RosamTmG/+	BMS777607 E11.5 - E12.5	47	11
56600R4	Pax3CreKI/+; RosamTmG/+	BMS777607 E11.5 - E12.5	79	15
